# Supplementary material for: Next-generation sequencing with a myeloid gene panel in core-binding factor AML showed KIT activation loop and TET2 mutations predictive of outcome
Source: PubMed Central journal article supplement (PMC5030377; doi:10.1038/bcj.2016.51), 2016-07-08

# Supplementary Figure S4

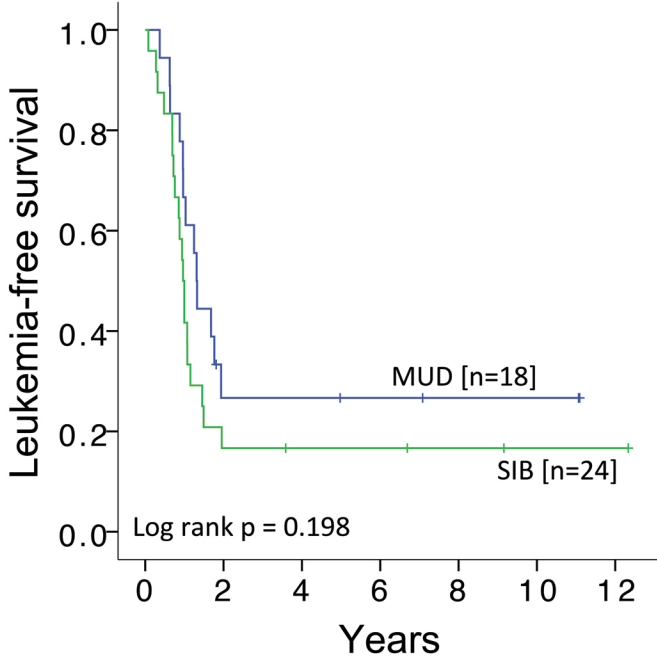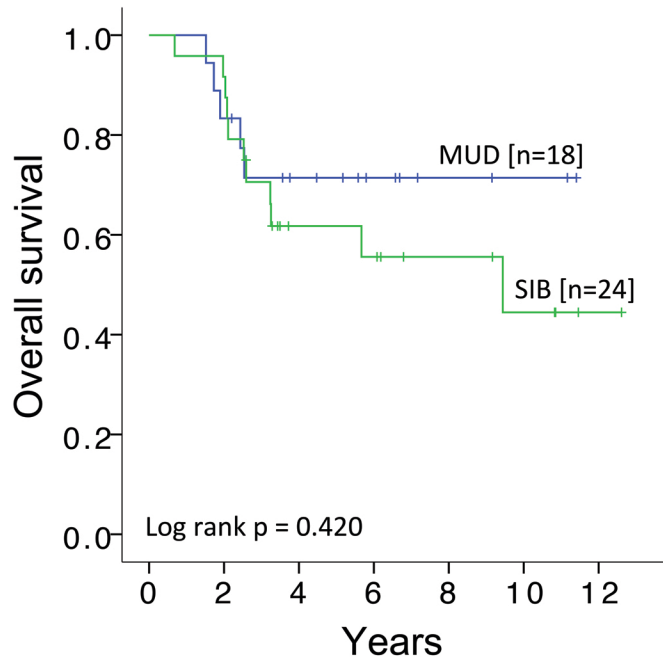

Supplement: bcj201651x5.pdf [file bcj201651x5.pdf]
